# Supplementary material for: Facile synthesis of spherical porphyrin polymer-supported cobalt nanoparticles for the efficient catalytic hydrogenation of 4-NP
Source: Royal Society of Chemistry journal article supplement (doi:10.1039/d4nj05375c), 2025-01-01

## Supporting Information

### Facile Synthesis of Spherical Porphyrin Polymer-supported Cobalt Nanoparticles for the Efficient Catalytic Hydrogenation of 4-NP

Jing Li; Jia Li; Cheng Tang; Fen Wang; Shuang Yan; Yanglei Li

**Figure S1.** UV-Vis spectroscopy of the reduction of 4-NP catalyzed by P-TPP-Co (II) and P-TPP-Ni (II) (a); Plot of  $\ln(C_0/C_t)$  versus reaction time for the reduction of 4-NP over P-TPP-Co(II) and P-TPP-Ni (II) (b)

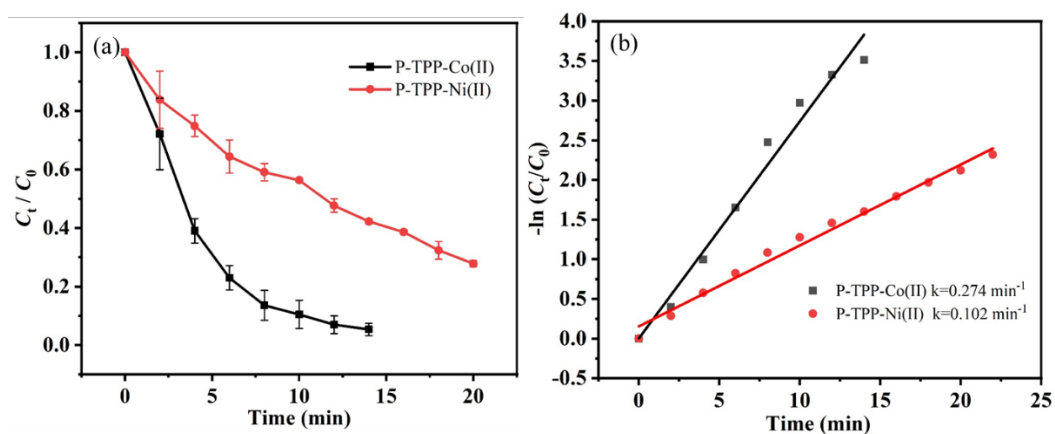

**Figure S2.** UV-vis spectroscopy of 4-NP (a) and RhB (b) reduction catalyzed by P-TPP-Co (II) with  $\text{NaBH}_4$

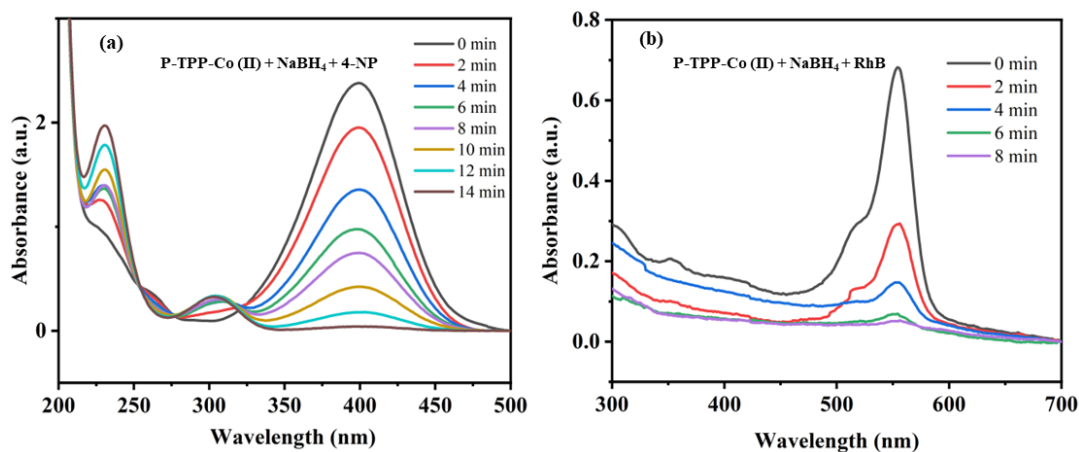

**Figure S3.** Schematic illustration of the 4-NP and RhB catalytic reduction on the P-TPP-Co (II).

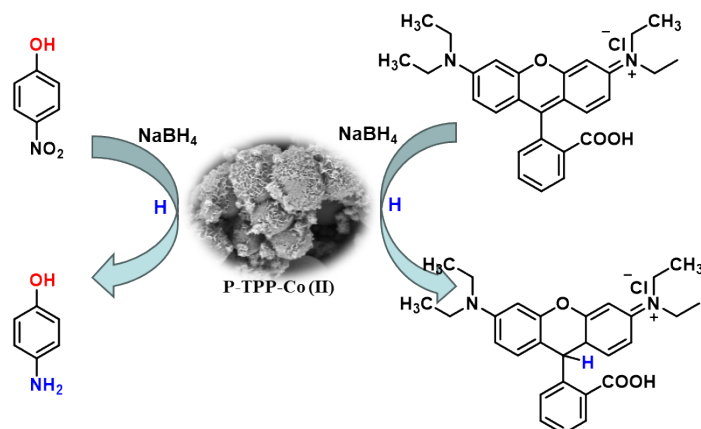

Supplement: d4nj05375c1.pdf [file d4nj05375c1.pdf]
